# Supplementary material for: Risk factors for the development of acute respiratory distress syndrome in mechanically ventilated adults in Peru: a multicenter observational study
Source: Springer Nature journal article supplement (doi:10.1186/s13054-019-2646-8), 2019-12-01
Supplement: MOESM1 [file 17478614]

**Online supplement for “Risk factors for the development of acute respiratory distress syndrome in mechanically ventilated adults in Peru: A multicenter observational study”**

Ena Gupta MD, Shakir Hossen MBBS MSPH, Matthew R Grigsby MSPH, Phabiola Herrera MD, Rollin Roldan MD, Enrique Paz MD, Amador A Jaymez MD, Eduardo E Chirinos MD, Jose Portugal MD, Rocio Quispe MD, Roy G Brower MD, William Checkley MD PhD; INTENSIVOS Cohort Study

**Table S1: Baseline characteristics, ventilatory parameters and outcomes in participants with early ARDS (<7 days) and late ARDS (≥ 7 days) after mechanical ventilation onset.**

|                                                  | <b>Early ARDS after<br/>mechanical ventilation<br/>onset</b> | <b>Late ARDS after<br/>mechanical ventilation<br/>onset</b> | <b>Overall</b> |
|--------------------------------------------------|--------------------------------------------------------------|-------------------------------------------------------------|----------------|
| Number of participants, n (%)                    | 117 (65%)                                                    | 63 (35%)                                                    | 180 (100%)     |
| Being male, n (%)                                | 60 (51.3%)                                                   | 32 (50.8%)                                                  | 92 (51.1%)     |
| Death at 90 days, n (%)                          | 64 (55.2%)                                                   | 35 (55.6%)                                                  | 99 (55.0%)     |
| Age in years, mean (SD)                          | 58.4 (19.2)                                                  | 60.4 (23.0)                                                 | 59.1 (20.6)    |
| Body mass index in kg/m <sup>2</sup> , mean (SD) | 27.7 (5.4)                                                   | 27.7 (5.9)                                                  | 27.7 (5.6)     |
| APACHE II, mean (SD)                             | 24.2 (8.3)                                                   | 23.2 (7.3)                                                  | 23.8 (7.9)     |
| APACHE III, mean (SD)                            | 84.6 (29.4)                                                  | 78.6 (27.7)                                                 | 82.5 (28.9)    |
| SOFA, mean (SD)                                  | 9.6 (3.7)                                                    | 8.8 (3.5)                                                   | 9.3 (3.6)      |
| SAPS II, mean (SD)                               | 56.5 (16.9)                                                  | 53.3 (14.2)                                                 | 55.4 (16.0)    |

|                                                                            |                 |                 |                 |
|----------------------------------------------------------------------------|-----------------|-----------------|-----------------|
| Fluid balance in mL, mean (SD)                                             | 4334.2 (2509.8) | 3873.4 (1983.7) | 4172.9 (2343.8) |
| Ventilator-free days, mean (SD)                                            | 7.4 (9.2)       | 4.6 (7.1)       | 6.4 (8.6)       |
| ICU free days, mean (SD)                                                   | 5.0 (7.3)       | 2.1 (4.7)       | 4.0 (6.6)       |
| Hospital free days, mean (SD)                                              | 8.4 (14.9)      | 5.2 (11.2)      | 7.3 (13.8)      |
| FiO <sub>2</sub> in %, mean (SD)                                           | 44.7 (14.8)     | 42.4 (15.6)     | 43.9 (15.0)     |
| PEEP, mean cm H <sub>2</sub> O (SD)                                        | 7.5 (3.5)       | 7.6 (3.4)       | 7.5 (3.4)       |
| PaO <sub>2</sub> /FiO <sub>2</sub> in mmHg, mean (SD)                      | 247.9 (113.9)   | 289.1 (165.1)   | 262.4 (135.0)   |
| Tidal volume in mL, mean (SD)                                              | 478.6 (100.5)   | 449.6 (74.2)    | 468.4 (93.0)    |
| Static compliance in mL/cm H <sub>2</sub> O, mean (SD)                     | 35.0 (25.5)     | 34.1 (12.4)     | 34.7 (22.1)     |
| Driving pressure in cm H <sub>2</sub> O, mean (SD)                         | 16.3 (5.3)      | 16.7 (5.5)      | 16.4 (5.3)      |
| Mean airway pressure in cm H <sub>2</sub> O, mean (SD)                     | 12.6 (4.0)      | 12.6 (3.9)      | 12.6 (4.0)      |
| Peak inspiratory pressure cm H <sub>2</sub> O, mean (SD)                   | 25.4 (6.7)      | 25.5 (6.8)      | 25.4 (6.7)      |
| Plateau pressure in cm H <sub>2</sub> O, mean (SD)                         | 23.7 (6.1)      | 23.2 (5.7)      | 23.5 (6.0)      |
| Tidal volume/predicted body weight in mL per kg/m <sup>2</sup> , mean (SD) | 8.7 (2.1)       | 8.3 (2.0)       | 8.6 (2.1)       |

**Table S2: Adjusted outcomes among study participants comparing early ARDS (<7 days) and late ARDS (≥ 7 days) after mechanical ventilation onset.** All regression models are adjusted for age, sex, hospital and APACHE III.

|                                         | <b>Late ARDS (≥ 7 days) vs early ARDS (&lt;7 days) after<br/>mechanical ventilation onset</b> |
|-----------------------------------------|-----------------------------------------------------------------------------------------------|
| Odds ratio of death at 90 days          | 1.19 (0.61, 2.36)                                                                             |
| Mean difference in ventilator-free days | -3.09 (-5.76, -0.43)                                                                          |
| Mean difference in ICU free days        | -3.02 (-4.97, -1.06)                                                                          |
| Mean difference in Hospital free days   | -3.88 (-8.01, 0.26)                                                                           |

**Table S3: Ventilatory parameters at the initiation of mechanical ventilation among mechanically ventilated participants who had ARDS at mechanical ventilation onset or developed ARDS after mechanical ventilation onset.**

| <b>Variables, mean (SD)</b>                    | <b>ARDS at mechanical<br/>ventilation onset<br/><br/>n=334</b> | <b>ARDS after mechanical<br/>ventilation onset<br/><br/>n=180</b> | <b>p-value</b> |
|------------------------------------------------|----------------------------------------------------------------|-------------------------------------------------------------------|----------------|
| FiO <sub>2</sub>                               | 0.54 (0.19)                                                    | 0.44 (0.15)                                                       | <0.001         |
| PEEP, cm H <sub>2</sub> O                      | 10.1 (4.5)                                                     | 7.5 (3.4)                                                         | <0.001         |
| PaO <sub>2</sub> /FiO <sub>2</sub> , mmHg      | 201.6 (101.5)                                                  | 262.4 (135.0)                                                     | <0.001         |
| Tidal volume, mL                               | 479.2 (108.7)                                                  | 468.4 (93.0)                                                      | 0.26           |
| Tidal volume, mL/kg PBW                        | 8.7 (2.3)                                                      | 8.6 (2.1)                                                         | 0.513          |
| Static compliance, mL/cm H <sub>2</sub> O      | 33.9 (20.4)                                                    | 34.7 (22.1)                                                       | 0.723          |
| Driving pressure, cm H <sub>2</sub> O          | 17.4 (5.8)                                                     | 16.4 (5.3)                                                        | <0.101         |
| Mean airway pressure, cm H <sub>2</sub> O      | 15.2 (4.6)                                                     | 12.6 (4.0)                                                        | <0.001         |
| Peak inspiratory pressure, cm H <sub>2</sub> O | 29.2 (7.0)                                                     | 25.4 (6.7)                                                        | <0.001         |
| Plateau Pressure, cm H <sub>2</sub> O          | 27.2 (7.5)                                                     | 23.5 (6.0)                                                        | <0.001         |

**Figure S1: Study Flowchart**

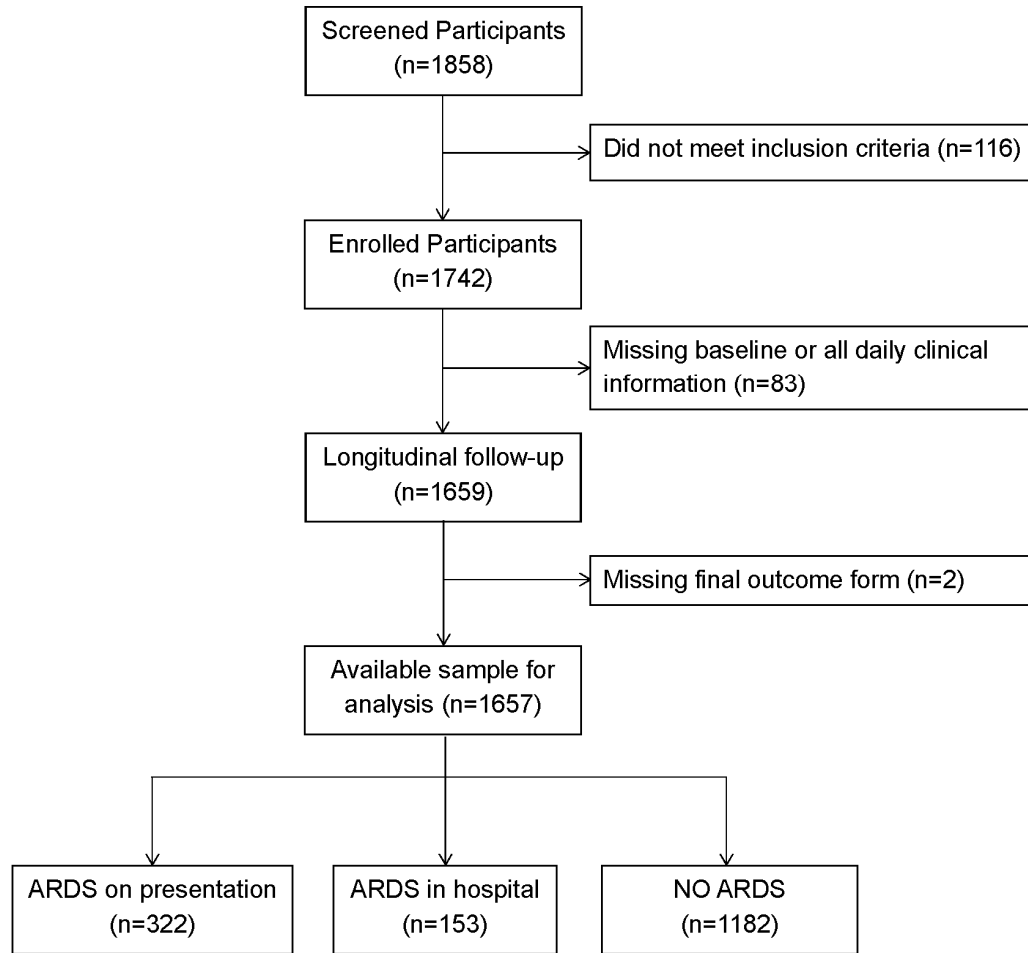

**Figure S1**

**Figure S2:** Percentage of ICU-days when a chest radiograph and an arterial blood gas were obtained for all days after mechanical ventilation onset.

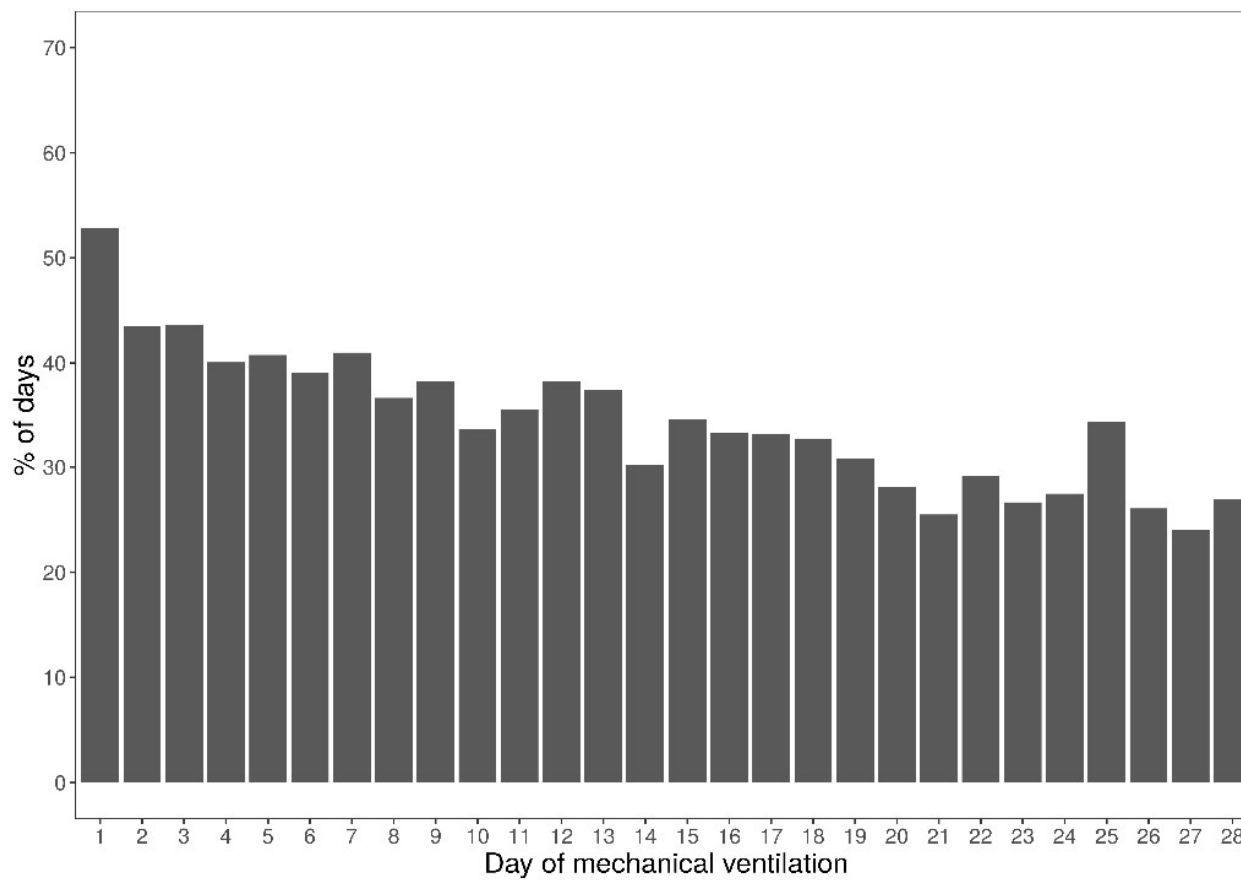

**Figure S2**

**Figure S3: Scatter plot of tidal volume (y-axis) and body mass index (x-axis) on the left and tidal volume (y-axis) and predicted body weight (x-axis) on the right.** The solid blue line represents fitted values of tidal volume across body mass index and predicted body weight, respectively. No variation was seen in tidal volume across body mass index ( $p=0.1$ ) whereas a linear relationship was seen between tidal volume and predicted body weight ( $p<0.001$ ).

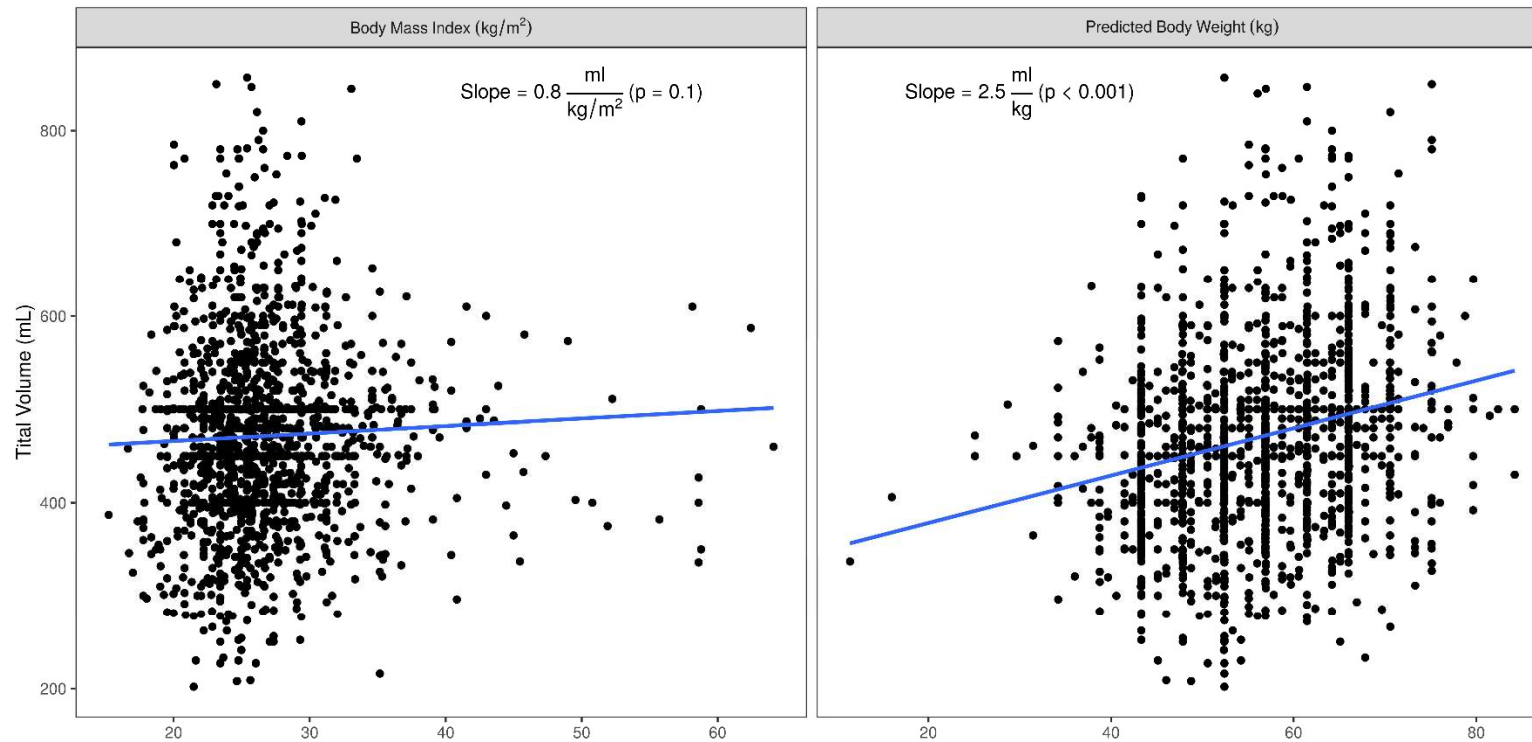

**Figure S3**
